# Supplementary material for: Synthesis, X-ray structure, antiproliferative activity, interaction with HSA and docking studies of three novel mono and binuclear copper complexes containing the maltol ligand
Source: Royal Society of Chemistry journal article supplement (doi:10.1039/d0nj03552a), 2020-01-01
Supplement: d0nj03552a1.pdf [file d0nj03552a1.pdf]

**Synthesis, X-ray structure, antiproliferative activity, interaction with HSA and docking studies of three novels of mono and binuclear copper complexes containing maltol ligand**

Malihe Zahmati Eraj<sup>1</sup>, Lars Eriksson<sup>2</sup>, Mona Alibolandi<sup>3</sup>, Maryam Babaei<sup>3</sup>, Amir Sh. Saljooghi<sup>1\*</sup>, Mohammad Ramezani<sup>3\*</sup>

<sup>1</sup>Department of Chemistry, Faculty of Science, Ferdowsi University of Mashhad, Mashhad, Iran.

<sup>2</sup>Department of Materials and Environmental Chemistry, Stockholm University, SE10691 Stockholm, Sweden.

<sup>3</sup>Pharmaceutical Research Center, Pharmaceutical Technology Institute, Mashhad University of Medical Sciences, Mashhad, Iran.

**Supplementary data:**

\*Corresponding Author: Amir. Sh. Saljooghi, Department of Chemistry, Faculty of Science, Ferdowsi University of Mashhad, 91775-1436, Mashhad, Iran, Email: [saljooghi@um.ac.ir](mailto:saljooghi@um.ac.ir)

\*Corresponding Author: Mohammad Ramezani, Pharmaceutical Research Center, Pharmaceutical Technology Institute, Mashhad University of Medical Sciences, Mashhad, Iran, Email: [RamezaniM@mums.ac.ir](mailto:RamezaniM@mums.ac.ir)

**Table S1**

Crystallographic data of the complexes (1), (2), and (3).

| Compound                                  | (1)                                                                                                 | (2)                                                                                 | (3)                                                                                                 |
|-------------------------------------------|-----------------------------------------------------------------------------------------------------|-------------------------------------------------------------------------------------|-----------------------------------------------------------------------------------------------------|
| CCDC-number                               | 1956605                                                                                             | 1956606                                                                             | 1956607                                                                                             |
| Empirical formula                         | C <sub>16</sub> H <sub>13</sub> Br <sub>2</sub> Cu N <sub>2</sub> O <sub>4</sub> , N O <sub>3</sub> | C <sub>16</sub> H <sub>26</sub> Cu N <sub>2</sub> O <sub>3</sub> , F <sub>6</sub> P | C <sub>36</sub> H <sub>26</sub> Cu <sub>2</sub> N <sub>4</sub> O <sub>6</sub> , 2(F <sub>6</sub> P) |
| M (g mol <sup>-1</sup> )                  | 582.65                                                                                              | 489.79                                                                              | 1027.65                                                                                             |
| T (K)                                     | 293                                                                                                 | 293                                                                                 | 293                                                                                                 |
| Radiation                                 | MoK $\alpha$                                                                                        | MoK $\alpha$                                                                        | MoK $\alpha$                                                                                        |
| $\lambda$ (Å)                             | 0.71073                                                                                             | 0.71073                                                                             | 0.71073                                                                                             |
| Crystal system                            | Monoclinic                                                                                          | Monoclinic                                                                          | Triclinic                                                                                           |
| Space group                               | P 2 <sub>1</sub> /c                                                                                 | P 2 <sub>1</sub> /c                                                                 | P -1                                                                                                |
| a (Å)                                     | 11.1803(2)                                                                                          | 8.0772(2)                                                                           | 8.153(2)                                                                                            |
| b (Å)                                     | 11.3573(2)                                                                                          | 14.8170(3)                                                                          | 11.328(3)                                                                                           |
| c (Å)                                     | 15.1698(3)                                                                                          | 15.2106(3)                                                                          | 22.236(7)                                                                                           |
| $\alpha$ (°)                              | 90                                                                                                  | 90                                                                                  | 93.697(7)                                                                                           |
| $\beta$ (°)                               | 94.906(2)                                                                                           | 101.928(2)                                                                          | 92.344(7)                                                                                           |
| $\gamma$ (°)                              | 90                                                                                                  | 90                                                                                  | 107.709(7)                                                                                          |
| V (Å <sup>3</sup> )                       | 1919.17(6)                                                                                          | 1781.10(7)                                                                          | 1948.3(10)                                                                                          |
| Z                                         | 4                                                                                                   | 4                                                                                   | 2                                                                                                   |
| D <sub>calc</sub> (g/cm <sup>3</sup> )    | 2.016                                                                                               | 1.827                                                                               | 1.752                                                                                               |
| $\mu$ (mm <sup>-1</sup> )                 | 5.348                                                                                               | 1.399                                                                               | 1.283                                                                                               |
| F (000)                                   | 1140                                                                                                | 980                                                                                 | 1028                                                                                                |
| Crystal size (mm <sup>3</sup> )           | 0.25 · 0.15 · 0.10                                                                                  | 0.16 · 0.14 · 0.10                                                                  | 0.13 · 0.03 · 0.02                                                                                  |
| $\theta$ range for data collection (°)    | 3.24 – 26.37                                                                                        | 3.35 – 26.37                                                                        | 2.53 – 25.68                                                                                        |
| Index ranges                              | -13 ≤ h ≤ 13<br>-14 ≤ k ≤ 14<br>-18 ≤ l ≤ 18                                                        | -10 ≤ h ≤ 10<br>-18 ≤ k ≤ 18<br>-19 ≤ l ≤ 19                                        | -9 ≤ h ≤ 9<br>-13 ≤ k ≤ 13<br>-27 ≤ l ≤ 27                                                          |
| Reflections collected                     | 43533                                                                                               | 27438                                                                               | 60653                                                                                               |
| Independent reflections, R <sub>int</sub> | 3918, 0.0446                                                                                        | 3637, 0.0269                                                                        | 7395, 0.2219                                                                                        |
| Data/restraints/parameters                | 3918 / 3 / 271                                                                                      | 3637 / 0 / 264                                                                      | 7395 / 0 / 561                                                                                      |

|                                   |        |        |        |
|-----------------------------------|--------|--------|--------|
| Goodness-of-fit on F <sup>2</sup> | 1.104  | 1.051  | 1.179  |
| Final R indexes [1≥2σ (1)]        | 0.0480 | 0.0485 | 0.1266 |
| Final R indexes [all data]        | 0.1254 | 0.1399 | 0.2786 |
| Largest difference,               | 1.085  | 0.894  | 0.738  |
| peak/hole (eÅ <sup>-3</sup> )     | -0.928 | -0.730 | -0.705 |

**Table S2**

Selected bond lengths (Å<sup>a</sup>) and angles (°) of the complexes.

| (1)               |          | (2)               |          | (3)               |          |
|-------------------|----------|-------------------|----------|-------------------|----------|
| Cu(1)-O(9)        | 1.906(4) | Cu(1)-O(8)        | 1.927(2) | Cu(1)-N(1)        | 1.99(1)  |
| Cu(1)-O(10)       | 1.963(4) | Cu(1)-O(9)        | 1.962(2) | Cu(1)-N(2)        | 1.968(8) |
| Cu(1)-O(11)       | 2.292(5) | Cu(1)-N(10)       | 1.985(2) | Cu(1)-O(20)       | 1.910(8) |
| Cu(1)-N(16)       | 1.984(4) | Cu(1)-N(21)       | 1.972(3) | Cu(1)-O(21)       | 1.928(8) |
| Cu(1)-N(27)       | 1.984(3) | Cu(1)-O(8')       | 2.472(4) | Cu(1)-O(20')      | 2.554    |
|                   |          |                   |          | Cu(2)-N(22)       | 1.97(9)  |
|                   |          |                   |          | Cu(2)-N(33)       | 1.97(7)  |
|                   |          |                   |          | Cu(2)-O(43)       | 1.92(6)  |
|                   |          |                   |          | Cu(2)-O(44)       | 1.93(1)  |
|                   |          |                   |          | Cu(2)-O(43')      | 2.51(4)  |
| O(9)-Cu(1)-O(10)  | 85.5(2)  | O(8)-Cu(1)-O(9)   | 85.3(1)  | N(1)-Cu(1)-N(2)   | 83.5(3)  |
| O(9)-Cu(1)-O(11)  | 99.0(2)  | O(8)-Cu(1)-N(10)  | 94.5(1)  | N(1)-Cu(1)-O(20)  | 178.2(4) |
| O(9)-Cu(1)-N(16)  | 161.9(2) | O(8)-Cu(1)-N(21)  | 176.2(1) | N(1)-Cu(1)-O(21)  | 95.4(4)  |
| O(9)-Cu(1)-N(27)  | 96.3(2)  | O(8)-Cu(1)-O(8)   | 89.72    | N(1)-Cu(1)-O(20') | 89.2     |
| O(10)-Cu(1)-O(11) | 99.7(2)  | O(9)-Cu(1)-N(10)  | 164.8(1) | N(2)-Cu(1)-O(20)  | 94.7(3)  |
| O(10)-Cu(1)-N(16) | 94.0(2)  | O(9)-Cu(1)-N(21)  | 97.5(1)  | N(2)-Cu(1)-O(21)  | 167.8(4) |
| O(10)-Cu(1)-N(27) | 170.2(2) | O(9)-Cu(1)-O(8')  | 100.32   | N(2)-Cu(1)-O(20') | 87.6     |
| O(11)-Cu(1)-N(16) | 98.9(2)  | N(10)-Cu(1)-N(21) | 82.1(1)  | O(20)-Cu(1)-O(21) | 86.3(3)  |
| O(11)-Cu(1)-N(27) | 89.5(2)  | N(10)-Cu(1)-O(8') | 94.90    | O(20)-Cu(1)-O(20) | 91.0     |

|                   |               |                   |       |                    |          |
|-------------------|---------------|-------------------|-------|--------------------|----------|
| N(16)-Cu(1)-N(27) | 81.3(2)       | N(21)-Cu(1)-O(8') | 92.28 | O(21)-Cu(1)-O(20') | 104.6    |
|                   |               |                   |       | N(22)-Cu(2)-N(33)  | 86.3(6)  |
| Symmetry codes:   |               |                   |       |                    |          |
| O(8')             | 2-x, 1-y, 1-z |                   |       | N(22)-Cu(2)-O(43)  | 177.6(2) |
| O(20')            | -x, -y, 1-z   |                   |       | N(22)-Cu(2)-O(44)  | 95.4(7)  |
| O(43')            | 2-x, 1-y, 1-z |                   |       | N(22)-Cu(2)-O(43') | 90.4(1)  |
|                   |               |                   |       | N(33)-Cu(2)-O(43)  | 94.3(8)  |
|                   |               |                   |       | N(33)-Cu(2)-O(44)  | 167.3(3) |
|                   |               |                   |       | N(33)-Cu(2)-O(43') | 88.1(7)  |
|                   |               |                   |       | O(43)-Cu(2)-O(44)  | 86.5(8)  |
|                   |               |                   |       | O(43)-Cu(2)-O(43)  | 90.2(4)  |
|                   |               |                   |       | O(44)-Cu(2)-O(43') | 104.4(6) |

[Cu(mal)(4,4 dibromo-bpy)(H<sub>2</sub>O)]<sup>+</sup> (1), [Cu(mal)(bpy)]<sub>2</sub><sup>+3</sup> (2), [Cu (mal) (1,10 phen)]<sub>2</sub><sup>+3</sup> (3) and . [Cu(bpy)(mal)(NO<sub>3</sub>)] (4)

**Table S3**

The selected hydrogen bond interactions. Selected bond lengths [Å] and angles [°]

| Complex        | D-H...A        | D-H  | H...A | D...A  | D-H...A |
|----------------|----------------|------|-------|--------|---------|
| (1)            | O11-H11A...O15 | 0.77 | 2.11  | 2.85   | 164.20  |
|                | O11-H11B...O14 | 0.77 | 2.16  | 2.90   | 161.08  |
|                | O11-H11B...O15 | 0.77 | 2.67  | 3.32   | 143.22  |
|                | C20-H20...O13  | 0.93 | 2.42  | 3.34   | 176.73  |
|                | C23-H23...O13  | 0.93 | 2.59  | 3.51   | 170.66  |
|                | C7-H7...Br1    | 0.93 | 2.92  | 3.70   | 141.89  |
| (2)            | C7-H7A...F5    | 0.96 | 2.57  | 3.38   | 142.52  |
|                | C11-H11...F4   | 0.93 | 2.41  | 3.18   | 140.13  |
|                | C12-H12...F6   | 0.93 | 2.62  | 3.49   | 154.92  |
|                | C14-H14...F1   | 0.93 | 2.63  | 3.01   | 105.09  |
|                | C19-H19...F3   | 0.93 | 2.62  | 3.15   | 117.29  |
|                | C20-H20...F5   | 0.93 | 2.64  | 3.52   | 159.17  |
| (3)            | C1-H1...F26    | 0.93 | 2.45  | 3.19   | 118.05  |
|                | C3-H3...F23    | 0.93 | 2.63  | 3.29   | 128.51  |
|                | C9-H9...F21    | 0.93 | 2.55  | 3.34   | 142.70  |
|                | C10-H10...F25  | 0.93 | 2.36  | 3.23   | 156.33  |
|                | C19-H19A...F25 | 0.96 | 2.55  | 3.39   | 146.85  |
|                | C27-H27...F24  | 0.93 | 2.44  | 3.31   | 157.14  |
| C42-H42C...F24 | 0.96           | 2.51 | 3.45  | 165.97 |         |

**Table S4**

$K_{SV}$  and  $k_q$  values for the binding of HSA to the Cu(II) complexes and maltol at three different temperatures.

| Compound | T(K) | $K_{SV}$ ( $\times 10^5 M^{-1}$ ) | $k_q$ ( $\times 10^{12} M^{-1}s^{-1}$ ) | $R^2$ |
|----------|------|-----------------------------------|-----------------------------------------|-------|
| 1        | 290  | 8.84                              | 8.84                                    | 0.96  |
|          | 296  | 7.78                              | 7.78                                    | 0.99  |
|          | 310  | 5.16                              | 5.16                                    | 0.99  |
| 2        | 290  | 10.97                             | 10.97                                   | 0.99  |
|          | 296  | 7.10                              | 7.10                                    | 0.99  |
|          | 310  | 5.62                              | 5.62                                    | 0.99  |
| 3        | 290  | 6.29                              | 6.29                                    | 0.99  |
|          | 296  | 5.51                              | 5.51                                    | 0.99  |
|          | 310  | 4.46                              | 4.46                                    | 0.99  |
| 4        | 290  | 10.05                             | 10.05                                   | 0.96  |
|          | 296  | 7.78                              | 7.78                                    | 0.99  |
|          | 310  | 5.16                              | 5.16                                    | 0.99  |
| Maltol   | 290  | 7.89                              | 7.89                                    | 0.99  |
|          | 296  | 6.79                              | 6.79                                    | 0.99  |
|          | 310  | 6.12                              | 6.12                                    | 0.99  |

**Table S5**

$K_b$  and  $n$  values for the binding of HSA to the Cu(II) complexes at three different temperatures.

| Compound | T(K) | $K_b$ ( $\times 10^5 M^{-1}$ ) | $n$  | $R^2$ |
|----------|------|--------------------------------|------|-------|
| 1        | 290  | 13.18                          | 1.03 | 0.96  |
|          | 296  | 8.51                           | 1.01 | 0.99  |
|          | 310  | 1.25                           | 0.90 | 0.99  |
| 2        | 290  | 102.33                         | 1.16 | 0.99  |
|          | 296  | 26.92                          | 1.09 | 0.99  |
|          | 310  | 3.80                           | 1.03 | 0.99  |
| 3        | 290  | 27.54                          | 1.1  | 0.99  |
|          | 296  | 22.38                          | 1.1  | 0.99  |
|          | 310  | 3.39                           | 1.04 | 0.99  |
| 4        | 290  | 144.54                         | 1.18 | 0.96  |
|          | 296  | 41.69                          | 1.12 | 0.99  |
|          | 310  | 2.04                           | 0.93 | 0.99  |
| Maltol   | 290  | 1.95                           | 0.90 | 0.99  |
|          | 296  | 0.54                           | 0.82 | 0.99  |
|          | 310  | 0.38                           | 0.80 | 0.99  |

**Table S6**

Thermodynamic parameters for the binding of HSA to the Cu(II) complexes at three different temperatures.

| Compound | T(K) | $\Delta G^\circ$ (kJ mol <sup>-1</sup> ) | $\Delta H^\circ$ (kJ mol <sup>-1</sup> ) | $\Delta S^\circ$ (j mol <sup>-1</sup> K <sup>-1</sup> ) |
|----------|------|------------------------------------------|------------------------------------------|---------------------------------------------------------|
| 1        | 290  | -27.06                                   | 95.32                                    | 422.35                                                  |
|          | 296  | -29.59                                   |                                          |                                                         |
|          | 310  | -35.50                                   |                                          |                                                         |
| 2        | 290  | -38.92                                   | -80.77                                   | -193.52                                                 |
|          | 296  | -36.44                                   |                                          |                                                         |
|          | 310  | -33.11                                   |                                          |                                                         |
| 3        | 290  | -35.75                                   | -82.21                                   | -158.71                                                 |
|          | 296  | -35.98                                   |                                          |                                                         |
|          | 310  | -32.82                                   |                                          |                                                         |
| 4        | 290  | -39.75                                   | -144.17                                  | -604.84                                                 |
|          | 296  | -37.51                                   |                                          |                                                         |
|          | 310  | -31.51                                   |                                          |                                                         |
| Maltol   | 290  | -29.37                                   | -53.84                                   | -86.04                                                  |
|          | 296  | -26.82                                   |                                          |                                                         |
|          | 310  | -27.18                                   |                                          |                                                         |

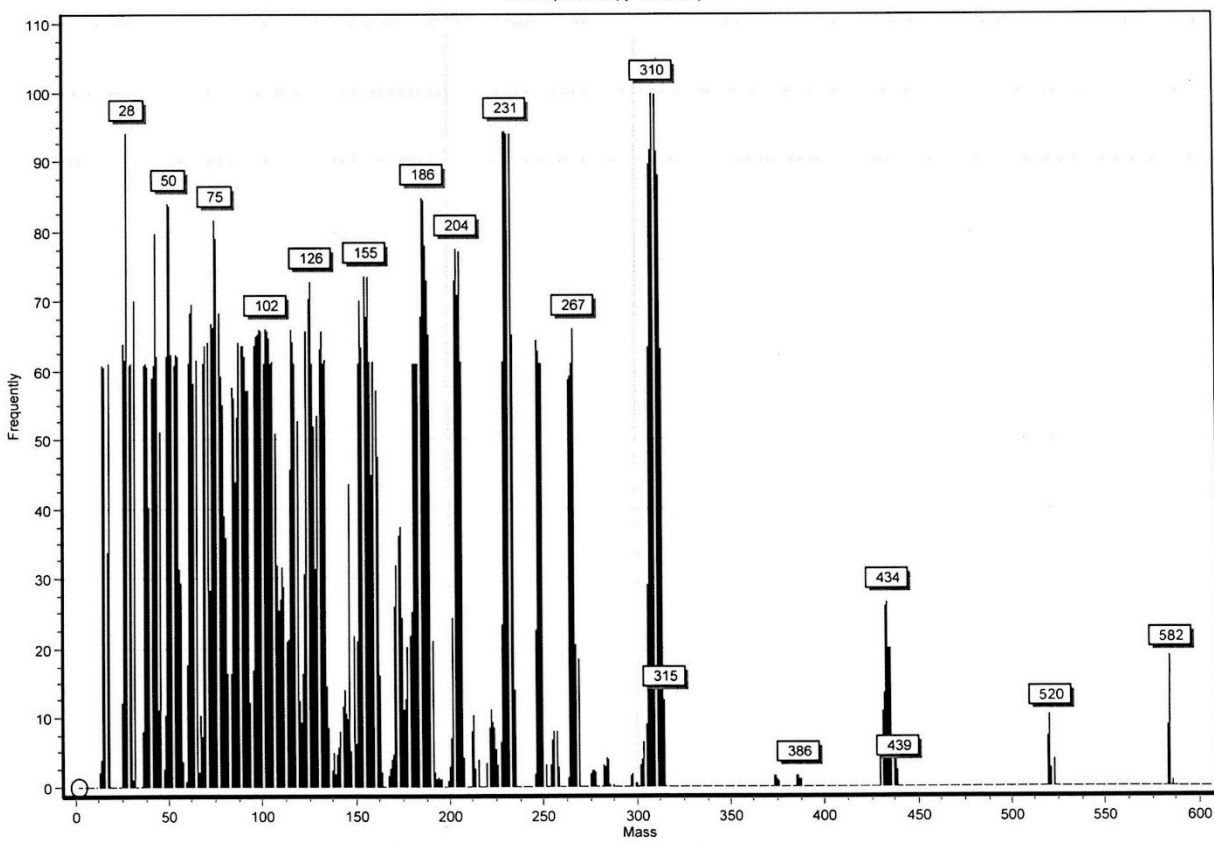

Name: zahmati Sample: 25B Date: 9/7/2020 Time: 7:20:11 AM Powered By: www.dadehabzar.com

**Figure S1.** Mass spectrum of  $[\text{Cu}(\text{mal})(4,4\text{-dibromo-}2,2\text{-bpy})(\text{H}_2\text{O})]\cdot\text{NO}_3(1)$

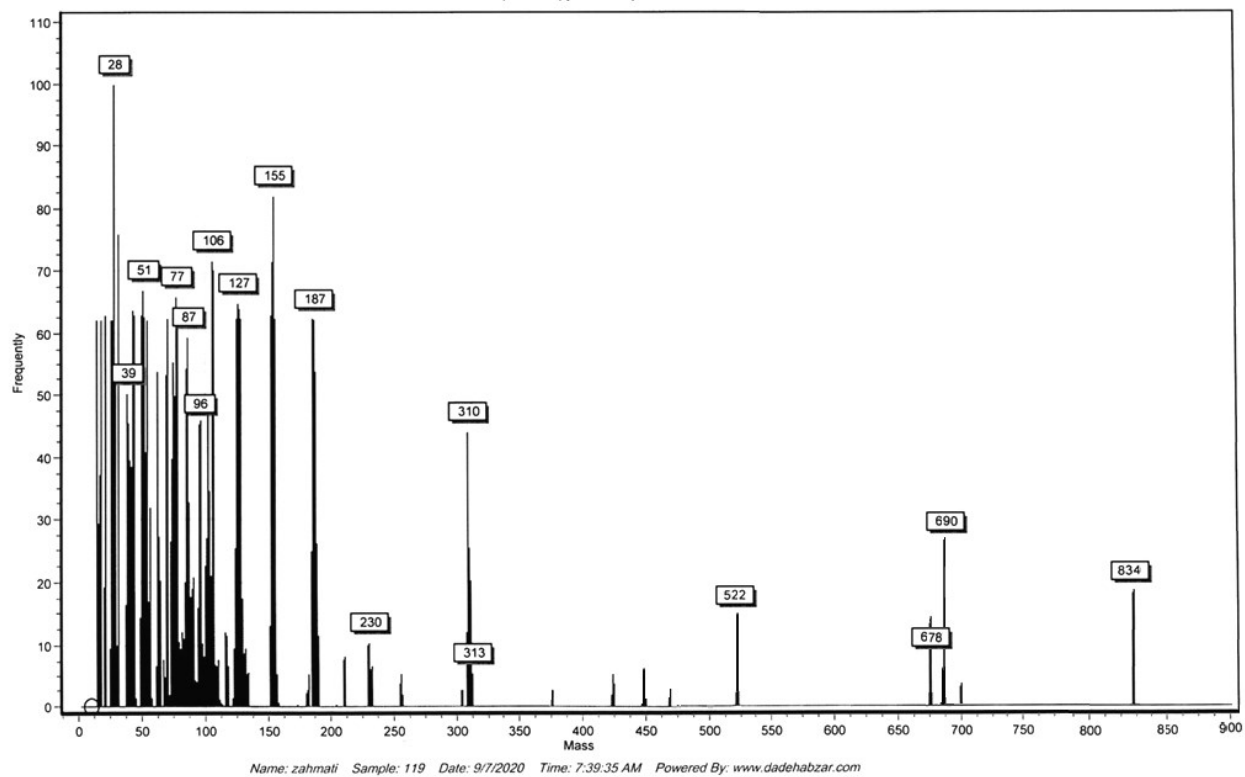

**Figure S2.** Mass spectrum of  $[\text{Cu}(\text{mal})(\text{bpy})]_2\text{PF}_6(2)$



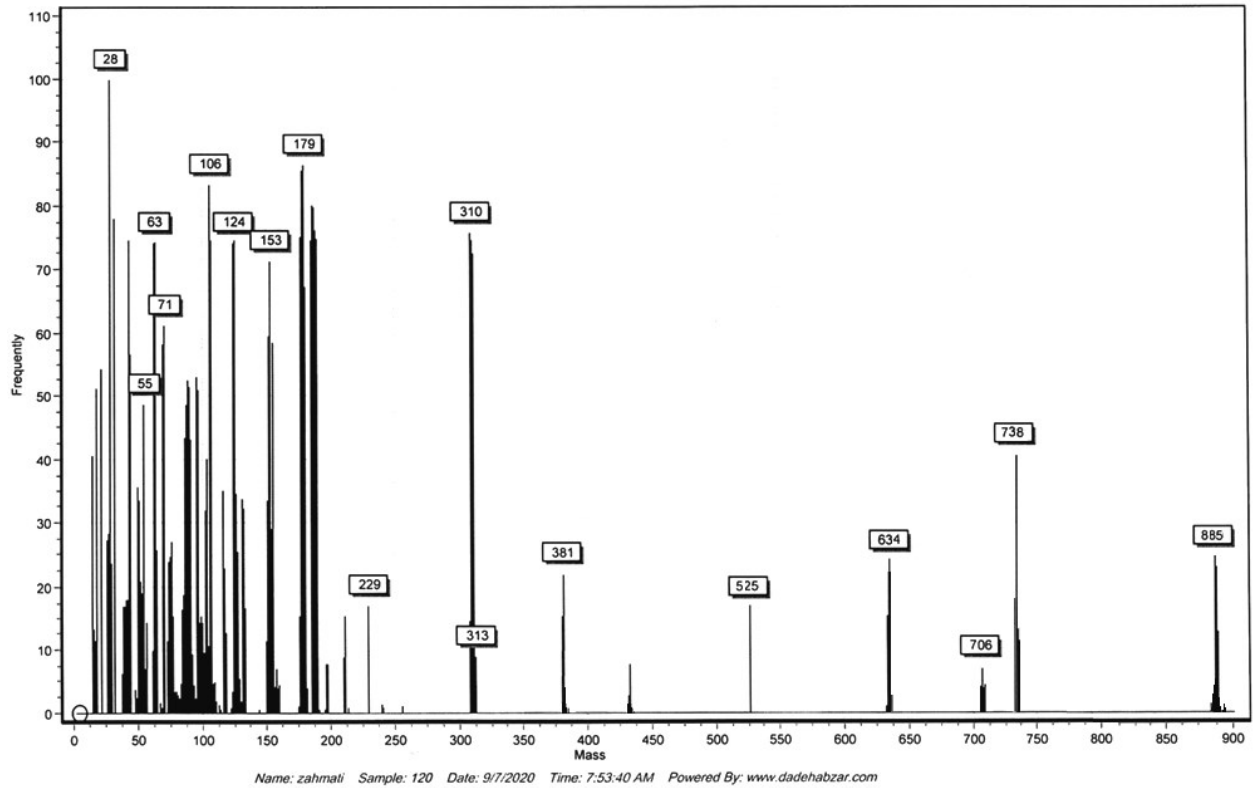

Figure S3. Mass spectrum of  $[\text{Cu}(\text{mal})(1,10 \text{ phen})]_2\text{PF}_6$  (3)

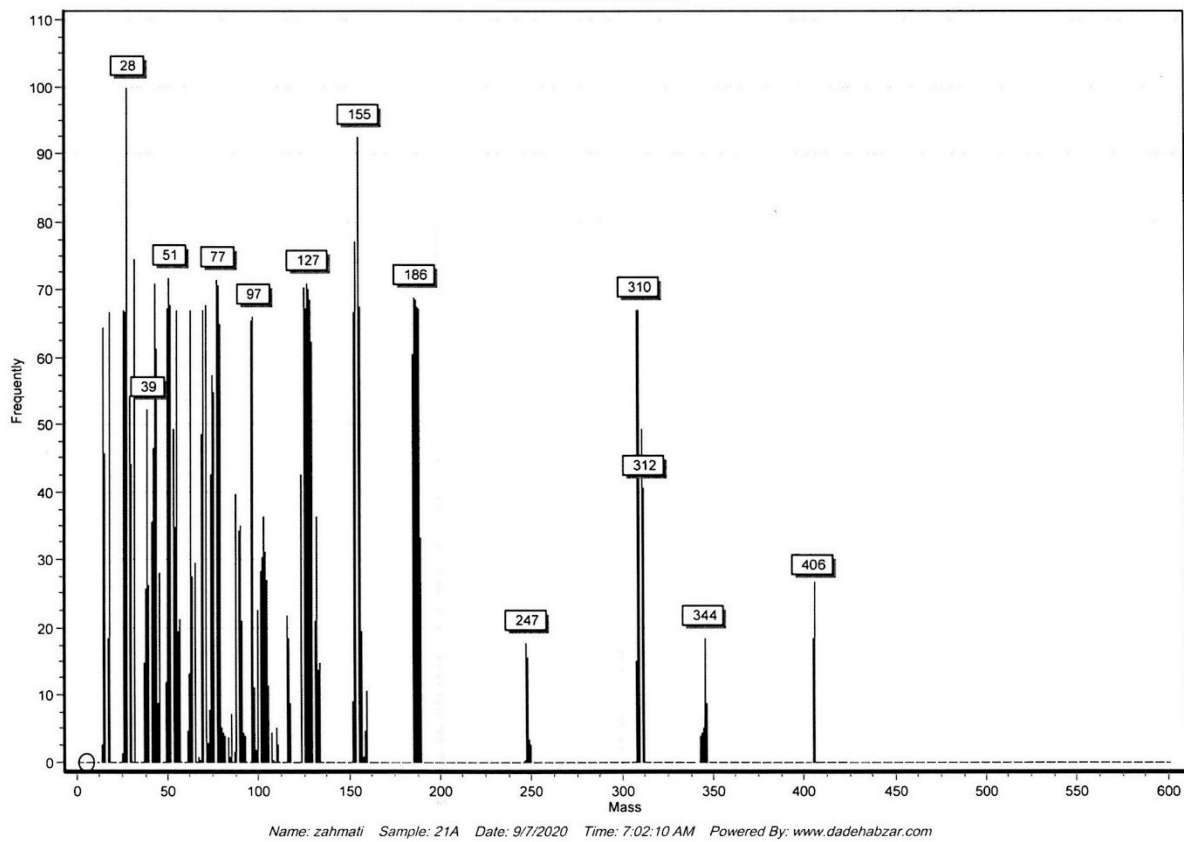

**Figure S4.** Mass spectrum of  $[\text{Cu}(\text{bpy})(\text{mal})(\text{NO}_3)]$  (4)

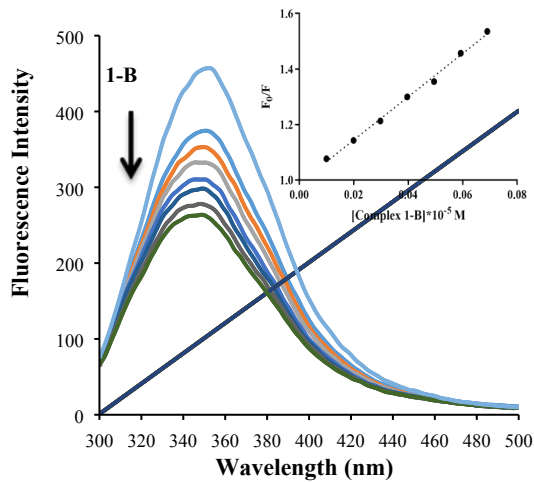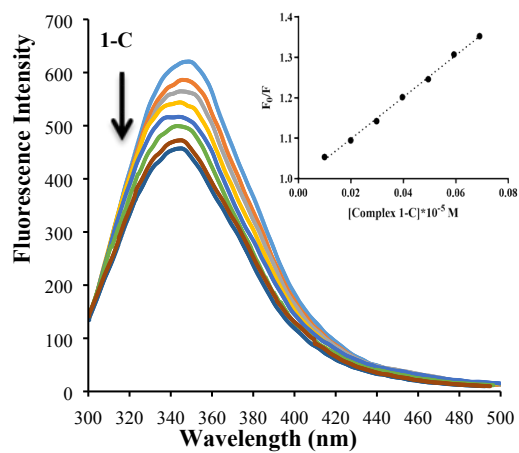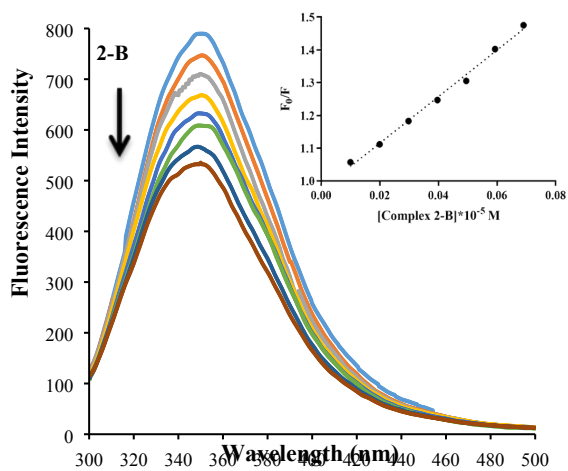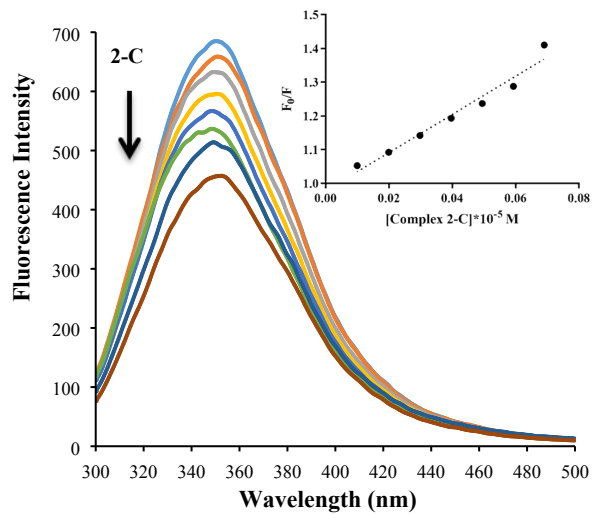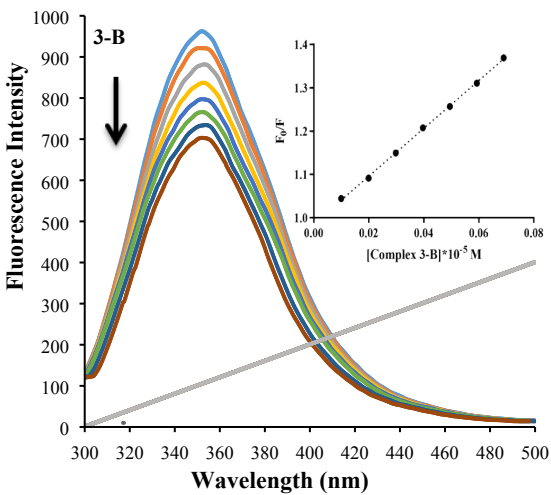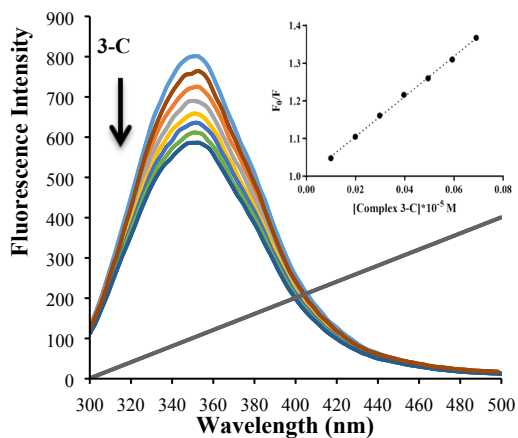

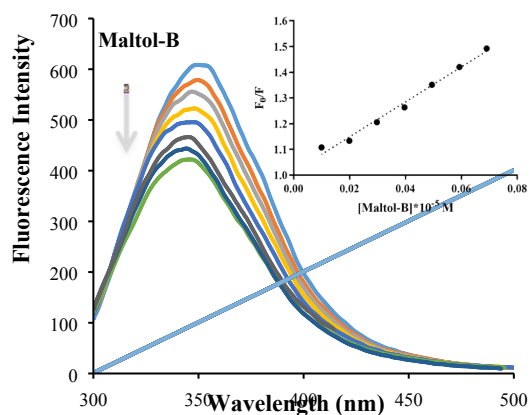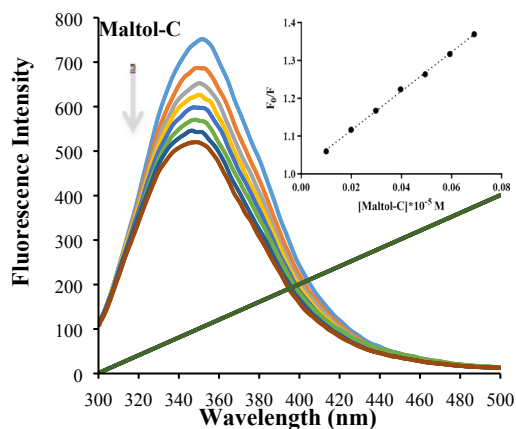

**Figure S5.** Fluorescence emission spectra of HSA ( $1.0 \times 10^{-6}$  M) in different concentrations of complexes 1, 2, 3, 4 and maltol corresponding to (0.00, 0.09, 0.19, 0.29, 0.39, 0.49, 0.59 and 0.69  $\mu$ M) with the excitation wavelength at 280 nm in 5 mM Tris\_HCl/50 mM NaCl buffer, pH 7.4, at temperatures (B: 296 and C: 310). The Arrow shows the intensity changes upon increasing the concentration of the quencher. Inset: The Stern–Volmer plots  $F_0/F$  versus [complex] for fluorescence quenching of HSA by the complexes at three different temperatures.

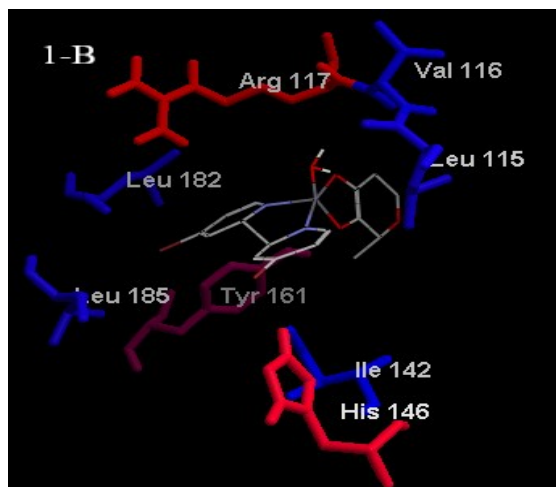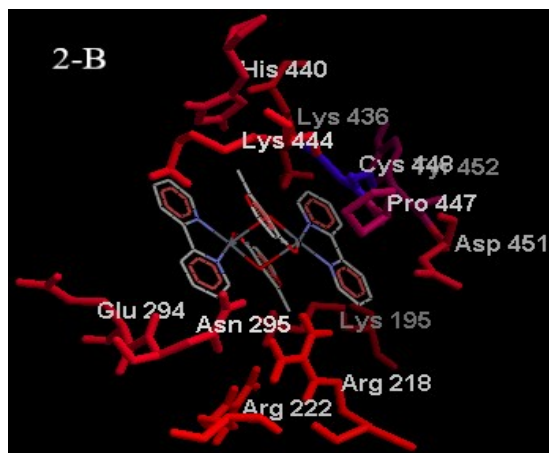

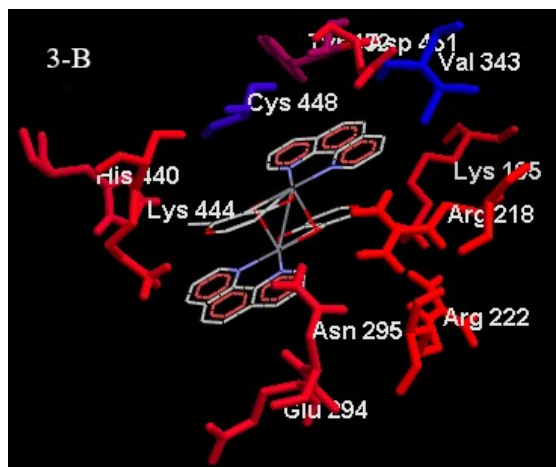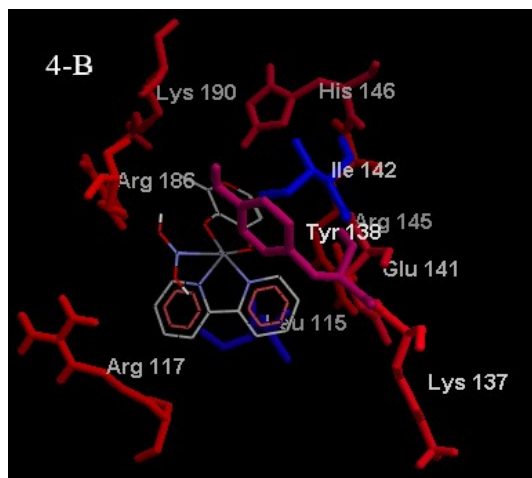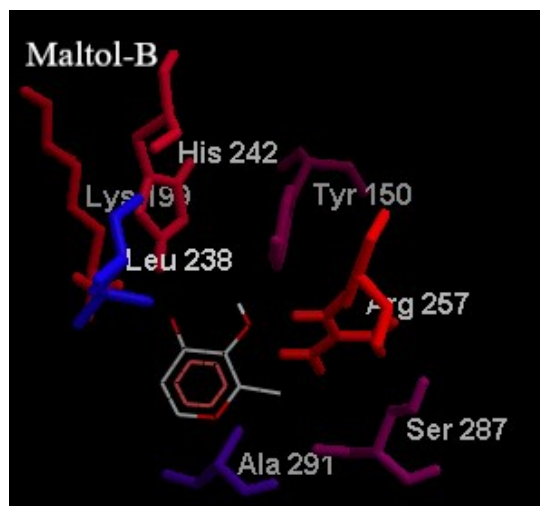

**Figure S6.** Molecular docking studies of complexes 1, 2, 3, 4 and maltol ligand with HSA. B: Hydrophobic interactions exist between the compound and HSA.
